# Supplementary material
Source: publisher site journal article supplement (https://www.dovepress.com/article/386026)
Supplement: Supplementary file 1 [file get_supplementary_file.php]

# Supplementary

## Abbreviations

AUA- American urological association

BC- bladder cancer

BCG- Bacillus-Calmette Guerin

BEUA- bimanual examination under anesthesia

CIS- Carcinoma in situ

CT- Computed tomography

CTU- - Computed tomography urography

DM- Detrusor muscle

EAU- European association of urology

ERBT- En-bloc resection of bladder tumor

HG- high grade

LG- Low grade

MIBC- Muscle invasive bladder cancer

mpMRI- multi-parametric magnetic resonance imaging

MRU- Magnetic resonance urography

NBI- Narrow band imaging

NMIBC- Non-muscle invasive bladder cancer

ONB- Obturator nerve block

ONR- Obturator nerve reflex

OS- Overall survival

PDD- Photodynamic diagnosis

PFS- Progression-free survival

RCT- Randomized controlled trial

RFS- Recurrence-free survival

TURBT- Transurethral resection of bladder tumor

UUTC- Upper urinary tract carcinoma

VI-RADS- Vesical imaging reporting and data system

WLC- White light cystoscopy

## Documentation of search

### Stage 1: search for the relevant terms for chapters

Following the principles of systematic review methodology,203 we began by defining the key concepts of transurethral resection of bladder tumor (TURBT) and identifying unresolved questions in this field. To achieve this, we first reviewed the American Urological Association (AUA) and European Association of Urology (EAU) guidelines for the treatment of non-muscle-invasive bladder cancer (NMIBC) (10, 11) and examined relevant review articles (74, 184). These sources aided in identifying key terms and concepts to guide our search.

We then constructed search strings addressing the identified questions, incorporating various relevant themes. PubMed was selected as the primary database due to its extensive and rigorous coverage of medical literature. To ensure relevance, we applied a cut-off date of 2018 to focus on recent studies but included earlier references where necessary to provide a comprehensive overview. The search concentrated in English articles only. We excluded results that were not relevant to the issue. We prioritized comparative studies, particularly randomized controlled trials (RCTs) and systematic reviews, documenting all relevant papers. Evidence for each aspect was summarized in dedicated sections, integrating key clinical guideline recommendations and concluding with our interpretations.

### Stage 2: search for the different chapters

1. **Medical history and Physical examination**("Physical examination"[tiab] OR "Physical exam"[tiab] OR "bimanual examination"[tiab] OR "medical history"[tiab] OR history[tiab]) AND ("Transurethral Resection of Bladder"[Mesh] OR "Transurethral Resection of Bladder"[tiab] OR Transurethral Resection[tiab] OR TURBT[tiab]) AND ("Urinary Bladder Neoplasms"[Mesh] OR "Non-Muscle Invasive Bladder Neoplasms"[Mesh] OR "Non-Muscle Invasive Bladder"[tiab] OR "Non Muscle Invasive Bladder"[tiab] OR "NonMuscle Invasive Bladder"[tiab]) **334 results, 91 since 2018, 23 reviewed.**
2. **Factors that affect TURBT quality and outcomes**("Transurethral Resection of Bladder"[tiab] AND quality[tiab]) OR "quality of turbt"[tiab] OR "quality of tur"[tiab] OR OR "quality of turbt" OR "quality of Transurethral Resection of Bladder" OR ((Presence of detrusor[tiab] OR presence of muscle[tiab] OR absence of detrusor[tiab] OR absence of muscle[tiab] OR senior[tiab] OR junior[tiab] OR experience[tiab]) AND ("Transurethral Resection of Bladder"[Mesh] OR "Transurethral Resection" OR "trans urethral" OR TURBT OR TUR) AND bladder)

**1613 results, of them 597 since 2018, 148 reviewed**

1. **Second TURBT (restaging TURBT)**(((second[tiab] OR repeat[tiab] OR restaging[tiab] OR recurrent[tiab]) AND ("Transurethral Resection of Bladder"[Mesh] OR "Transurethral Resection of Bladder"[tiab] OR Transurethral Resection[tiab] OR TURBT[tiab])) OR re-TURBT OR reTURBT[tiab] OR re TURBT[tiab] OR re-TUR[tiab]) AND ("Urinary Bladder Neoplasms"[Mesh] OR "Non-Muscle Invasive Bladder Neoplasms"[Mesh] OR "Non-Muscle Invasive Bladder"[tiab] OR "Non Muscle Invasive Bladder"[tiab] OR "NonMuscle Invasive Bladder"[tiab])
   **1319 results, of them 386 since 2018, 98 reviewed**
2. **Random & prostatic urethra biopsy, Complications, Location of tumor and its influence on outcomes**("Random biopsy"[tiab] OR "Random biopsies"[tiab] OR Prostatic urethra biopsy[tiab] OR " urethra biopsy"[tiab] OR "prostate biopsy"[tiab] OR complications[tiab] OR "obturator nerve reflex"[tiab] OR "obturator reflex"[tiab] OR ONR[tiab] OR perforation[tiab] OR hemorrhage[tiab] OR "lateral wall"[tiab] OR "anterior wall"[tiab] OR diverticula[tiab] OR diverticuli[tiab] OR orifice[tiab]) AND ("Transurethral Resection of Bladder"[Mesh] OR "Transurethral Resection of Bladder"[tiab] OR Transurethral Resection[tiab] OR TURBT[tiab]) AND ("Urinary Bladder Neoplasms"[Mesh] OR "Non-Muscle Invasive Bladder Neoplasms"[Mesh] OR "Non-Muscle Invasive Bladder"[tiab] OR "Non Muscle Invasive Bladder"[tiab] OR "NonMuscle Invasive Bladder"[tiab])
   **693 results, of them 246 since 2018, 48 reviewed**
3. **Surgical methods to increase TURBT efficacy**("En-bloc resection"[tiab] OR "enbloc resection"[tiab] OR "en bloc resection"[tiab] OR bipolar[tiab] OR monopolar[tiab]) AND ("Urinary Bladder Neoplasms"[Mesh] OR "Non-Muscle Invasive Bladder Neoplasms"[Mesh] OR "Non-Muscle Invasive Bladder"[tiab] OR "Non Muscle Invasive Bladder"[tiab] OR "NonMuscle Invasive Bladder"[tiab])
   **302 results, of them 171 since 2018, 89 reviewed**
4. **Enhanced cystoscopy and TURBT imaging
   PDD**PDD bladder
   **205 results, of them 96 since 2018, 14 reviewed**
   **NBI**("Narrow Band Imaging"[Mesh] OR "narrow band imaging"[tiab] OR "narrow-band imaging"[tiab] OR "narrow band"[tiab]) AND ("Transurethral Resection of Bladder"[Mesh] OR "Transurethral Resection of Bladder"[tiab] OR Transurethral Resection[tiab] OR TURBT[tiab] OR cystoscopy[tiab]) AND ("Urinary Bladder Neoplasms"[Mesh] OR "Non-Muscle Invasive Bladder Neoplasms"[Mesh] OR "Non-Muscle Invasive Bladder"[tiab] OR "Non Muscle Invasive Bladder"[tiab] OR "NonMuscle Invasive Bladder"[tiab])
   **136 results, of them 51 since 2018, 25 reviewed**
5. **Future directions- AI**("Artificial intelligence"[tiab] OR "Artificial Intelligence"[Mesh] OR "image 1 s"[tiab] OR "image 1s"[tiab] OR SPIES[tiab] OR Storz[tiab]) AND ("Transurethral Resection of Bladder"[Mesh] OR "Transurethral Resection of Bladder"[tiab] OR Transurethral Resection[tiab] OR TURBT[tiab] OR cystoscopy[tiab]) AND ("Urinary Bladder Neoplasms"[Mesh] OR "Non-Muscle Invasive Bladder Neoplasms"[Mesh] OR "Non-Muscle Invasive Bladder"[tiab] OR "Non Muscle Invasive Bladder"[tiab] OR "NonMuscle Invasive Bladder"[tiab])
   **97 results, of them 64 since 2018, 31 reviewed**

### Stage 3: confirmation and references inspection

In order to ensure the absence of any redundancies, an additional search was conducted using the aforementioned terms, and the reviewed articles were duly marked. A total of 2822 articles were discovered, with 992 of them published since January 2018 to September 2024. To provide a comprehensive assessment and to augment our findings, we meticulously scrutinized the references cited within the articles and incorporated any additional relevant sources that we deemed necessary.
At this point we also reviewed the additional results of 2024 to provide the most up to date picture and created figure 1 to summarize.
